# Supplementary material for: Hierarchical micro-/mesoporous N- and O-enriched carbon derived from disposable cashmere: a competitive cost-effective material for high-performance electrochemical capacitors
Source: Royal Society of Chemistry journal article supplement (doi:10.1039/c4gc02032d), 2014-12-15
Supplement: c4gc02032d1.pdf [file c4gc02032d1.pdf]

## Supporting Information

### **Hierarchical micro-/mesoporous N- and O-enriched carbon derived from disposable cashmere: A competitive cost-effective material for high performance electrochemical capacitors**

*Lu Zhou <sup>a</sup>, Siqi Zhu <sup>a</sup>, Hui Cao <sup>a</sup>, Linrui Hou <sup>a</sup> and Changzhou Yuan <sup>\*a, b</sup>*

*<sup>a</sup> School of Materials Science & Engineering, Anhui University of Technology, Ma'anshan, 243002, P.R. China*

E-mail: [ayuancz@163.com](mailto:ayuancz@163.com)

*<sup>b</sup> Chinese Academy of Science (CAS) Key Laboratory of Materials for Energy Conversion, Hefei, 230026, P.R. China*

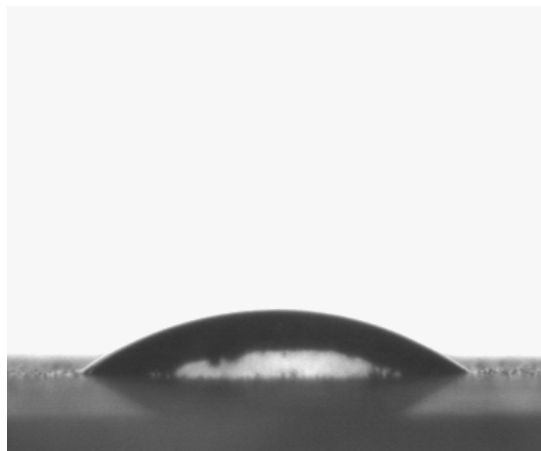

**Fig. S1.** Contact angle of the hierarchical CDMMC sample

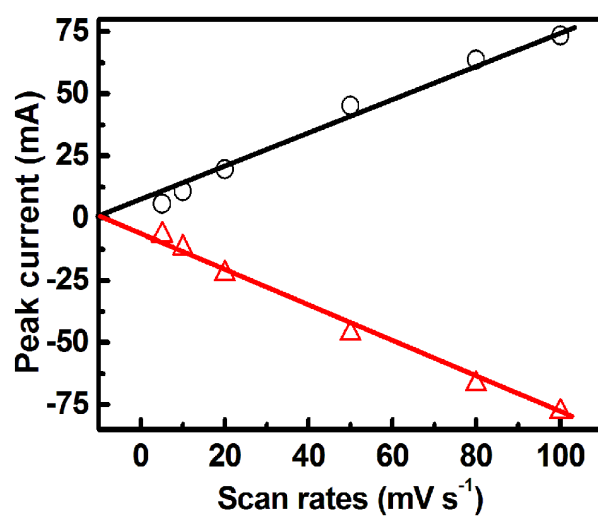

**Fig. S2.** Relationship between electrochemically cathodic and anodic redox peak currents and the sweep rate of the hierarchical CDMMC electrode in 1 M  $\text{H}_2\text{SO}_4$  electrolyte

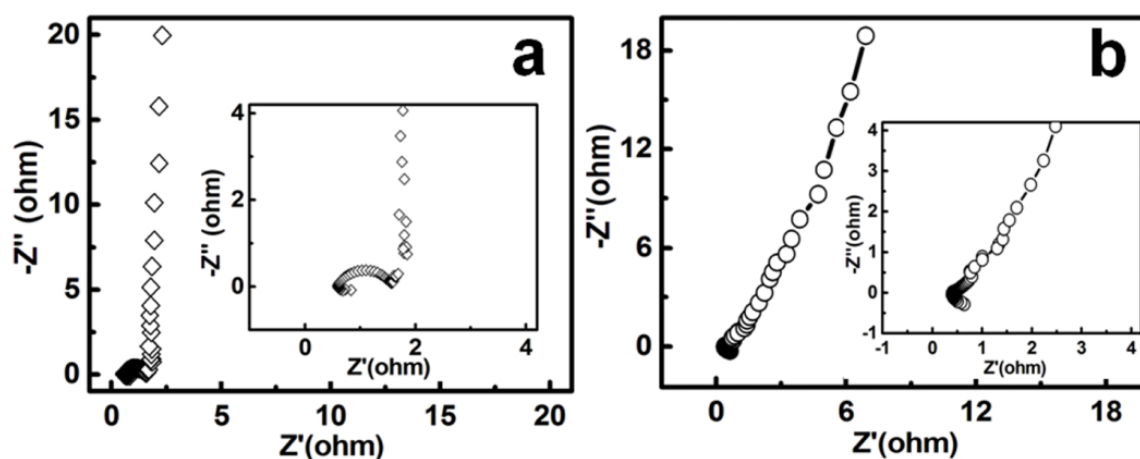

**Fig. S3.** EIS spectra of the CDMMC electrode in three-electrode configurations with (a) 6 M KOH and (b) 1 M  $H_2SO_4$  solutions. The insets in (a, b) for the corresponding high-frequency regions of the EIS spectra, respectively

In general, the intersection of the plots at the X-axis represents solution resistance ( $R_s$ ), which is associated with the following three items: the resistance of the aqueous solution, the intrinsic resistance of the electroactive material itself, and the contact resistance at the interface between electroactive material and current collector. As observed in **Fig. S3a, b**, the values for the  $R_s$  in the 6 M KOH and 1 M  $H_2SO_4$  are observed as  $\sim 0.56$  Ohm and 0.41 Ohm, respectively.

**Table S1.** SCs of the CDMMC vs. recently published heteroatom-rich carbons all tested in three-electrode configurations with different electrolytes

| Carbon type                  | SCs (F g <sup>-1</sup> )/<br>discharge current<br>density (A g <sup>-1</sup> ) | electrolyte                    | electrochemical<br>window<br>(V) | Ref.      |
|------------------------------|--------------------------------------------------------------------------------|--------------------------------|----------------------------------|-----------|
| CDMMC                        | 363/0.5                                                                        | KOH                            | 1.0                              | This work |
| CDMMC                        | 460/0.5                                                                        | H <sub>2</sub> SO <sub>4</sub> | 1.0                              | This work |
| Porous N-doped CNT           | 220/0.5                                                                        | KOH                            | 1.0                              | [1]       |
| Functionalized carbon        | 319/0.5                                                                        | KOH                            | 1.0                              | [2]       |
| Hair-derived carbon          | 340/2.0                                                                        | KOH                            | 1.0                              | [3]       |
| Nitrogen-doped<br>graphene   | 280/<1.0                                                                       | KOH                            | 0.8                              | [4]       |
| Leaves derived carbon        | 400/0.5                                                                        | KOH                            | 1.0                              | [5]       |
| Partially reduced GO         | 347/0.2                                                                        | H <sub>2</sub> SO <sub>4</sub> | 1.0                              | [6]       |
| Graphene-CNT<br>architecture | 326                                                                            | H <sub>2</sub> SO <sub>4</sub> | 1.0                              | [7]       |
| Bacteria promoted<br>carbon  | 327/1.0                                                                        | H <sub>2</sub> SO <sub>4</sub> | 1.0                              | [8]       |
| N-containing HTC             | 300/0.2                                                                        | H <sub>2</sub> SO <sub>4</sub> | 1.0                              | [9]       |
| Zeolite template carbon      | 340/0.1                                                                        | H <sub>2</sub> SO <sub>4</sub> | 1.2                              | [10]      |
| PANI derived carbon          | 239/0.5                                                                        | H <sub>2</sub> SO <sub>4</sub> | 1.0                              | [11]      |
| Rice husk                    | 243/0.05                                                                       | KOH                            | 1.0                              | [12]      |

[1] G. Y. Xu, B. Ding, P. Nie, L. F. Shen, J. Wang, X. G. Zhang, *Chem. Eur. J.* **2013**, 19, 12306.

[2] L. Qie, W. Chen, H. Xu, X. Xiong, Y. Jiang, F. Zou, X. Hu, Y. Xin, Z. Zhang, Y. Huang, *Energy Environ. Sci.* **2013**, 6, 2497

[3] W. J. Qian, F. X. Sun, Y. H. Xun, L. H. Qiu, C. H. Liu, S. D. Wang, F. Yan, *Energy Environ. Sci.* **2014**, 7, 379.

[4] H. M. Jeong, J. W. Lee, W. H. Shin, Y. J. Choi, H. J. Shin, J. K. Kang, J. W. Choi, *Nano Lett.* **2011**, 11, 2472.

- [5] M. Biswal, A. Banerjee, M. Deo, S. Ogale, *Energy Environ. Sci.* **2013**, 6, 1249.
- [6] Y. Chen, X. O. Zhang, D. C. Zhang, P. Yu, Y. W. Ma, *Carbon* **2011**, 49, 573.
- [7] S. Y. Yang, K. H. Chang, H. W. Tien, Y. F. Lee, S. M. Li, Y. S. Wang, J. Y. Wang, C. C. M. Ma, C. C. Hu, *J. Mater. Chem.* **2011**, 21, 2374.
- [8] H. Sun, L. Cao, L. Lu, *Energy Environ. Sci.* **2012**, 5, 6206.
- [9] L. Zhao, L. Z. Fan, M. Q. Zhou, H. Guan, S. Y. Qiao, M. Antonietti, M. M. Titirici, *Adv. Mater.* **2010**, 22, 5202.
- [10] C. O. Ania, V. Khomenko, E. Raymundo-Pinero, J. B. Parra, F. Beguin, *Adv. Funct. Mater.* **2007**, 17, 1828.
- [11] T. Bordjiba, M. Mohamedi, L. H. Dao, *Adv. Mater.* **2008**, 20, 815.
- [12] X. J. He, P. H. Ling, M. X. Yu, X. T. Wang, X. Y. Zhang, M. D. Zheng, *Electrochim. Acta* **2013**, 105, 635.

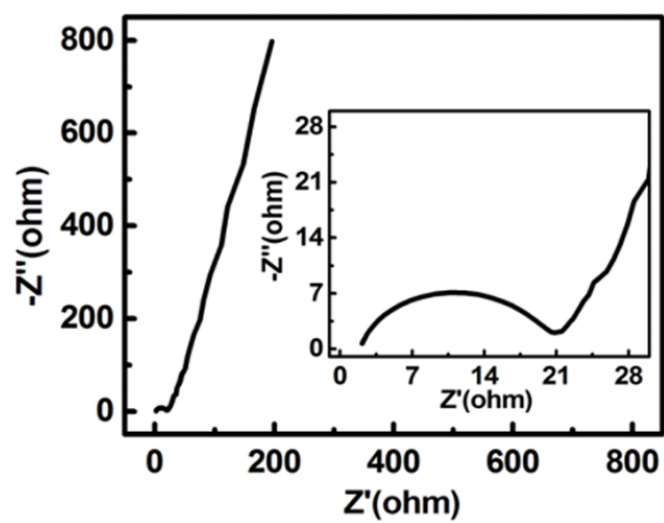

**Fig. S4.** EIS pattern of the CDMMC-based symmetric EC with 1 M TEABF<sub>4</sub>/PC electrolyte. The inset for the corresponding high-frequency region of the EIS spectrum
